# Supplementary material for: Perception of con- and heterospecific injury cues in tadpoles of dendrobatid, ranid and bufonid frogs (Anura)
Source: Springer Nature journal article supplement (doi:10.1007/s10682-023-10275-z), 2023-10-30
Supplement: MOESM1 [file 10682_2023_10275_MOESM1_ESM.docx]

**Supplementary material**

**S1: Husbandry of adult *Ranitomeya sirensis* and *Epipedobates anthonyi* individuals**

Adult individuals were housed in glass tanks (60 x 30 x 30 cm) with conspecifics at constant room temperature (23-25°C) and humidity (70-90%). The frogs' primary food source consisted of flight-deprived fruit flies (*Drosophila melanogaster*), supplemented with springtails, and fed to the frogs three times per week. The tanks were equipped with a clay-based substrate, leaf litter, sticks, golden pothos twines (*Epipremnum aureum*), 50 mL falcon tubes or 280 mL beakers filled with demineralised water. The tubes or beakers served as nurseries, where newly hatched tadpoles were placed by adult individuals. Regular checks were conducted, to transfer newly hatched tadpoles into dedicated tadpole housing environments located in the same room.
